# Supplementary material
Source: Springer Nature journal article supplement (https://www.springermedizin.de/resource/supplementary/12882_2005_52_MOESM1_ESM.pdf/9454852)

268 patients with clinic  
appointment between  
01/01/2004 – 08/31/2004

35 “no shows”

25

started renal  
replacement therapy

1

death

9

lost to follow-up

233 patients screened

7 without laboratory data  
28 with CKD stages 1-3

198 patients included

61 seen  $\leq$  6 months  
**SHORT NEPHROLOGY CARE**

137 seen  $>$  6 months  
**LONG NEPHROLOGY CARE**

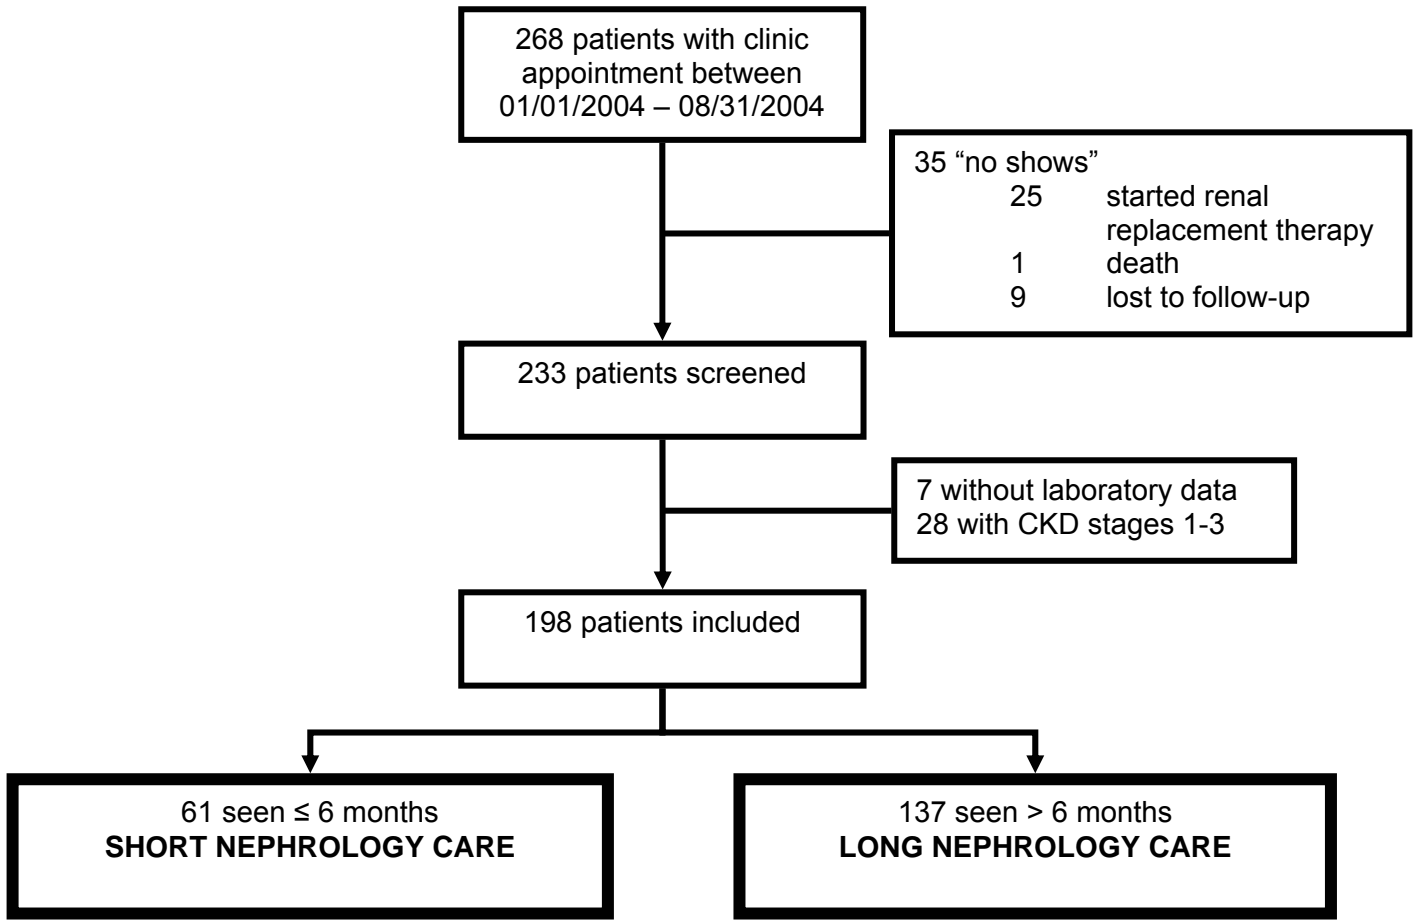

Supplement: MOESM1 [file 9454852]
